# Supplementary material for: A Metzincin and TIMP-Like Protein Pair of a Phage Origin Sensitize Listeria monocytogenes to Phage Lysins and Other Cell Wall Targeting Agents
Source: MDPI journal article supplement (doi:10.3390/microorganisms9061323), 2021-06-18
Supplement: s1 [file s1]

## Supplementary Figure S1

A.

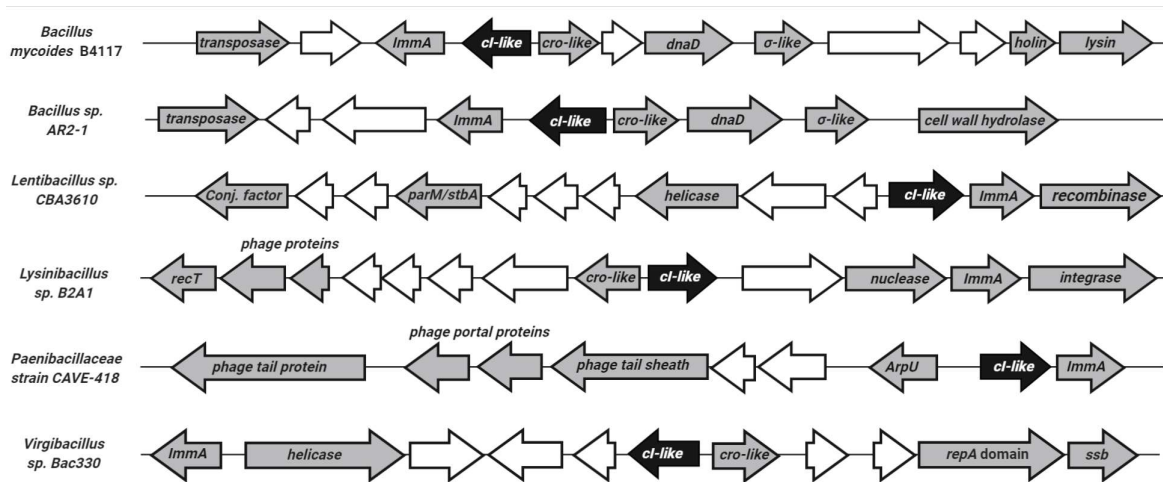

B.

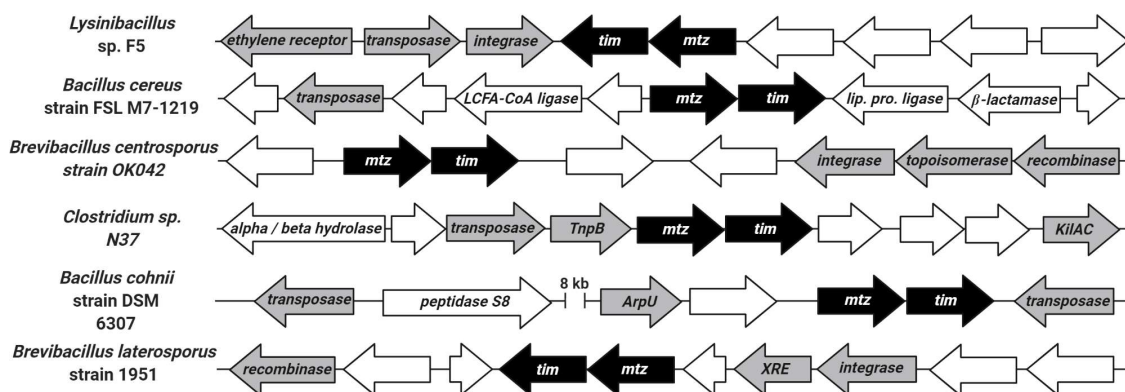

**Figure S1. (A) Bioinformatic analysis of *cl*-like homologues in Gram-positive bacteria (Firmicutes).** Schematic representation of the *cl*-like homologues (~ 60% similarity, not including the HTH domain, belonging to the HipB superfamily) and proximal genes in Firmicutes bacteria related to *Lm*. The *cl*-like homologues are found proximal to mobile genetic element-associated genes and *immA* antirepressors. Black arrows represent the *cl*-like homologues, gray arrows represent mobile genetic element genes. (B) In Firmicutes bacteria related to *Listeria*, gene pairs highly similar to the metzincin-TIMP-like pair are found proximal to mobile genetic element genes. Black arrows represent the *cro-cl*-like/metzincin-TIMP-like genes, gray arrows represent mobile genetic element genes.

## Supplementary Figure S2

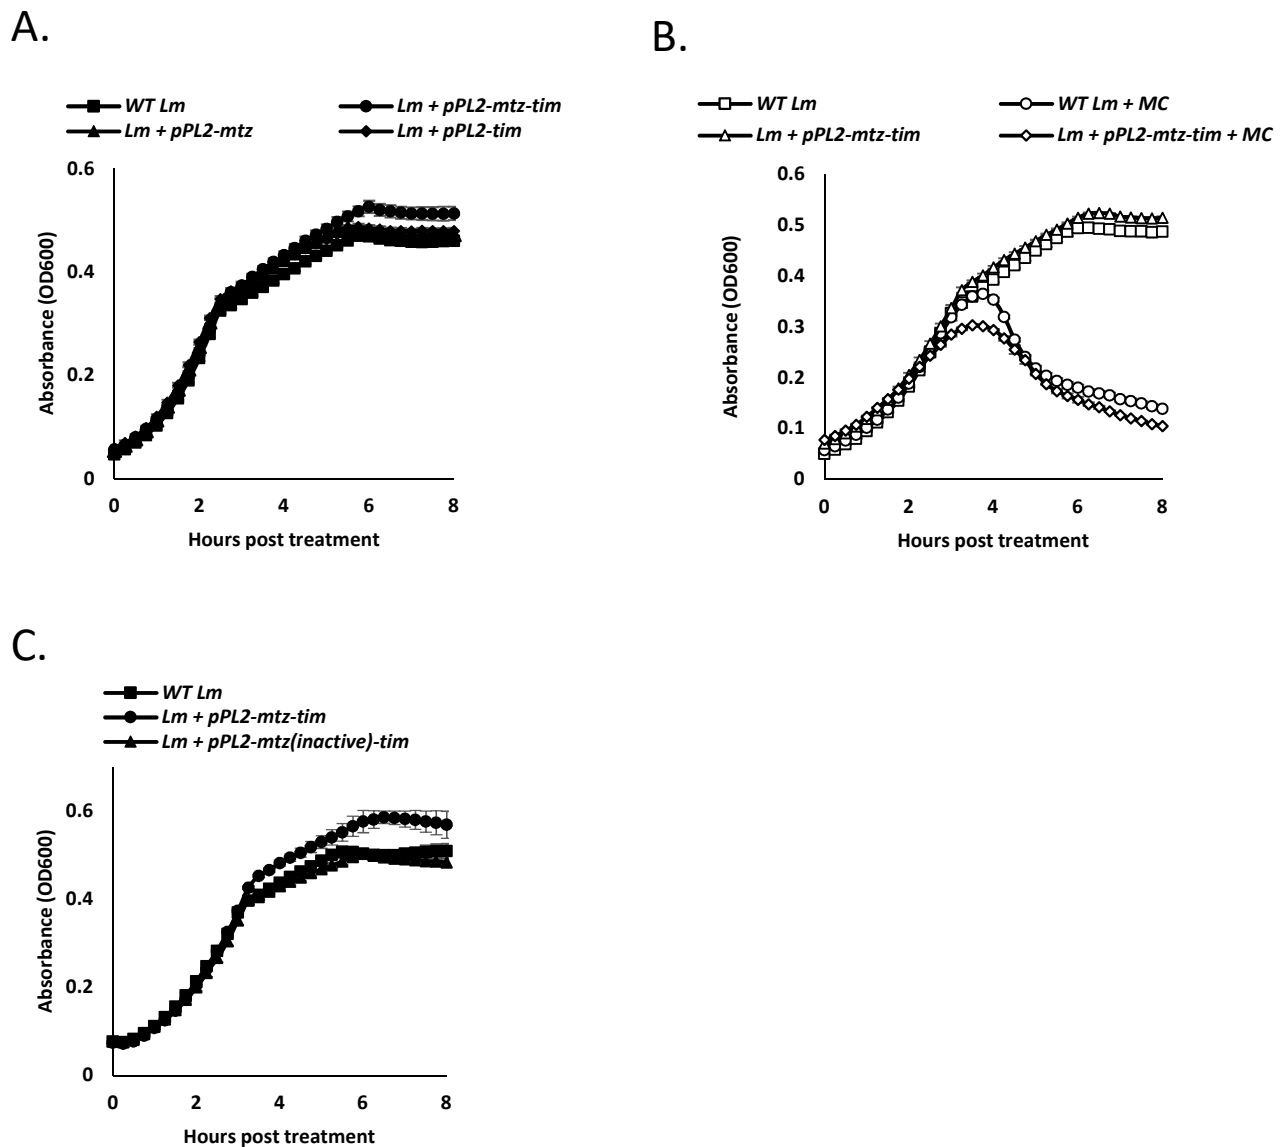

**Figure S2. Ectopic expression of Mtz-Tim does not affect *Lm* growth in BHI at 37°C.**

(A) Growth analysis in BHI media of WT *Lm*, and WT *Lm* harboring pPL2 integrative plasmid expressing *mtz*, *tim* or both from an inducible  $p_{tetR}$  promoter (pPL2-*mtz*, pPL2-*tim*, and pPL2-*mtz-tim* respectively) at 37°C. (B) Growth analysis in BHI media of WT *Lm*, and WT *Lm* harboring pPL2 integrative plasmid expressing *mtz* and *tim* from an inducible  $p_{tetR}$  promoter (pPL2-*mtz-tim*) with and without MC treatment at 30°C. (C) Growth analysis in BHI media of WT *Lm*, and WT *Lm* harboring pPL2 integrative plasmid expressing *mtz-tim* or *mtz* mutated at position E136A with *tim* from an inducible  $p_{tetR}$  promoter (pPL2-*mtz-tim* and pPL2-*mtz(inactive)-tim*, respectively) at 37°C. Data in A-C represent three independent experiments and error bars represent the standard deviation of triplicates.

## Supplementary Figure S3

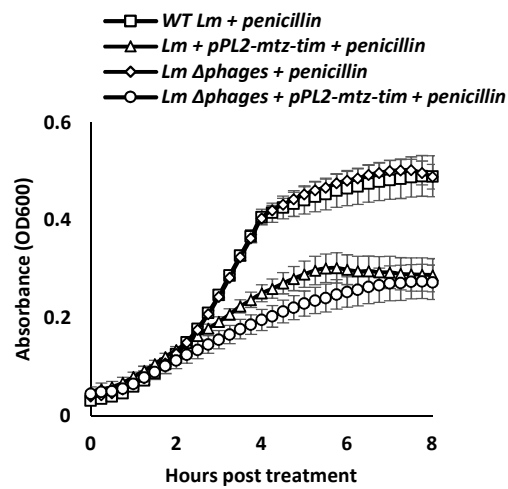

**Figure S3. The sensitivity of Mtz-Tim expressing bacteria to penicillin is independent of the phage elements.** Growth analysis in BHI media of *Lm* strain deleted of the phage elements ( $\Delta$ phages) and WT *Lm* harboring pPL2 plasmid expressing *mtz-tim* from an inducible  $p_{tetR}$  promoter (pPL2-*mtz-tim*) at 37°C, with and without addition of penicillin. Data represent three independent experiments and error bars represent the standard deviation of triplicates.

## Supplementary Figure S4

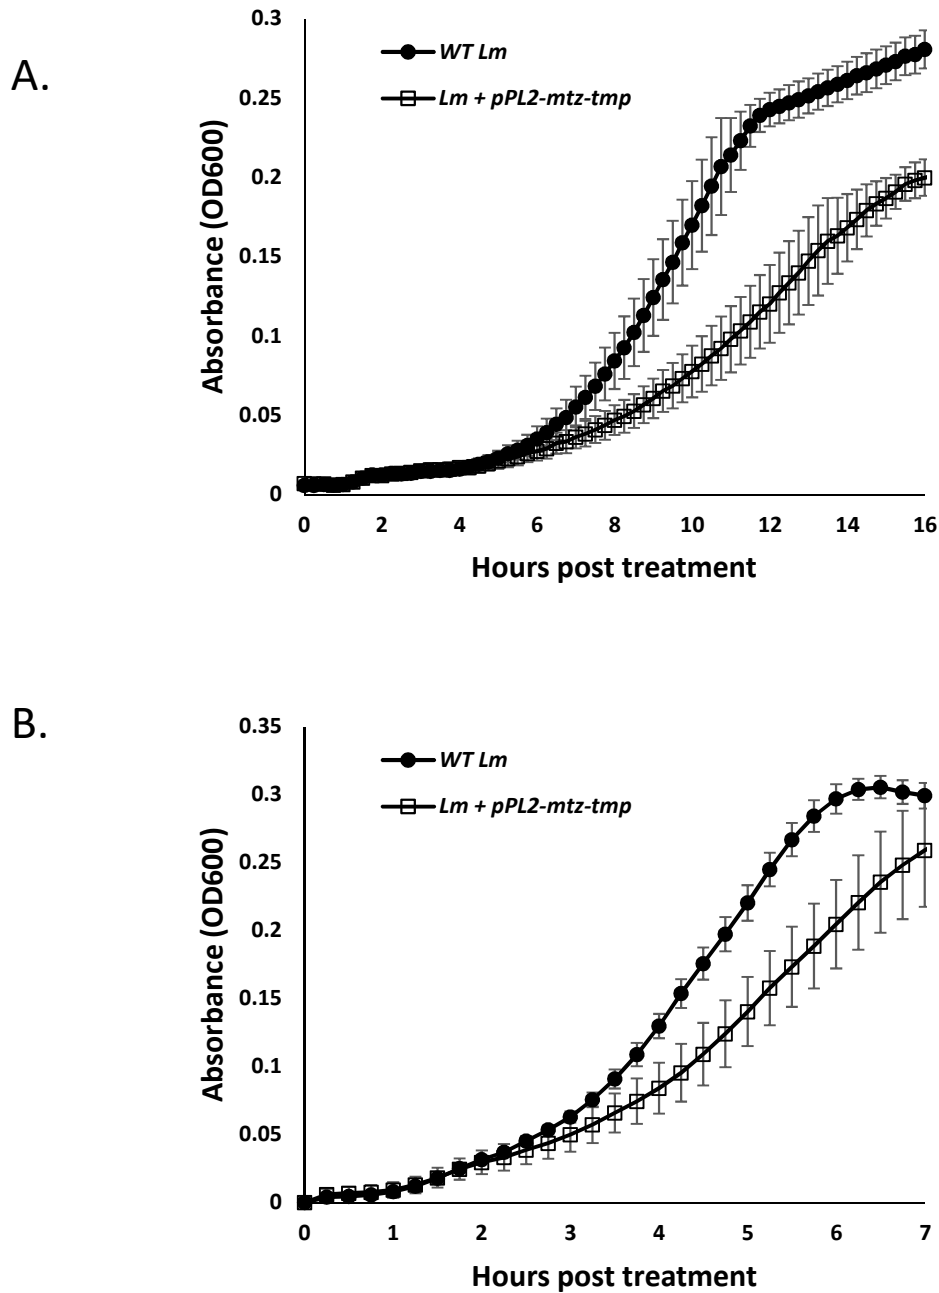

**Figure S4. Ectopic expression of Mtz-Tim sensitizes *Lm* to cell-wall acting antibiotics.** Growth analysis in BHI media of *WT Lm* and *WT Lm* harboring pPL2 plasmid expressing *mtz-tim* from an inducible  $p_{tetR}$  promoter (pPL2-*mtz-tim*) at 37°C, with and without addition of 250 µg/ml of bacitracin (A) and 12 µg/ml D-cycloserine (B). Data represent an average of three independent experiments and error bars represent the standard deviation.

## Supplementary Figure S5

A.

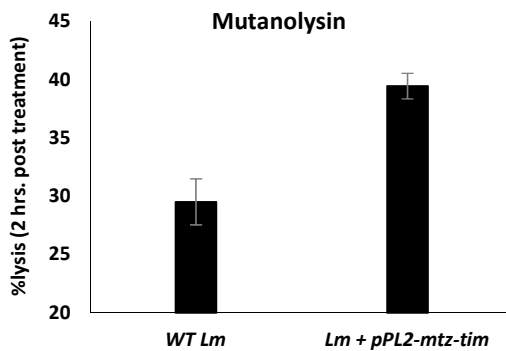

B.

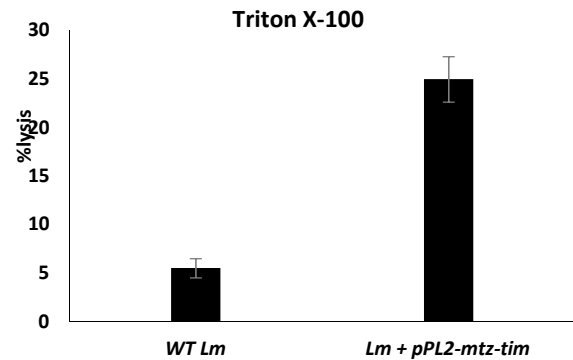

**Figure S5. Ectopic expression of Mtz-Tim sensitizes *Lm* to lysis caused by mutanolysin or Triton X-100.** Growth analysis in BHI media at 37°C of WT *Lm*, and WT *Lm* harboring pPL2 plasmid expressing *mtz-tim* from an inducible  $p_{tetR}$  promoter (pPL2-*mtz-tim*) with and without addition of mutanolysin (A) or Triton X-100 (B). Data is presented as percentage of lysis at 2 hours after treatment. The data represent three independent experiments, error bars represent the standard deviation of triplicates.
